# Supplementary material for: Palmitic acid control of ciliogenesis modulates insulin signaling in hypothalamic neurons through an autophagy-dependent mechanism
Source: PubMed Central journal article supplement (PMC9334645; doi:10.1038/s41419-022-05109-9), 2022-07-28

# Supplementary Material

## Western Blots

Fig. 2

E

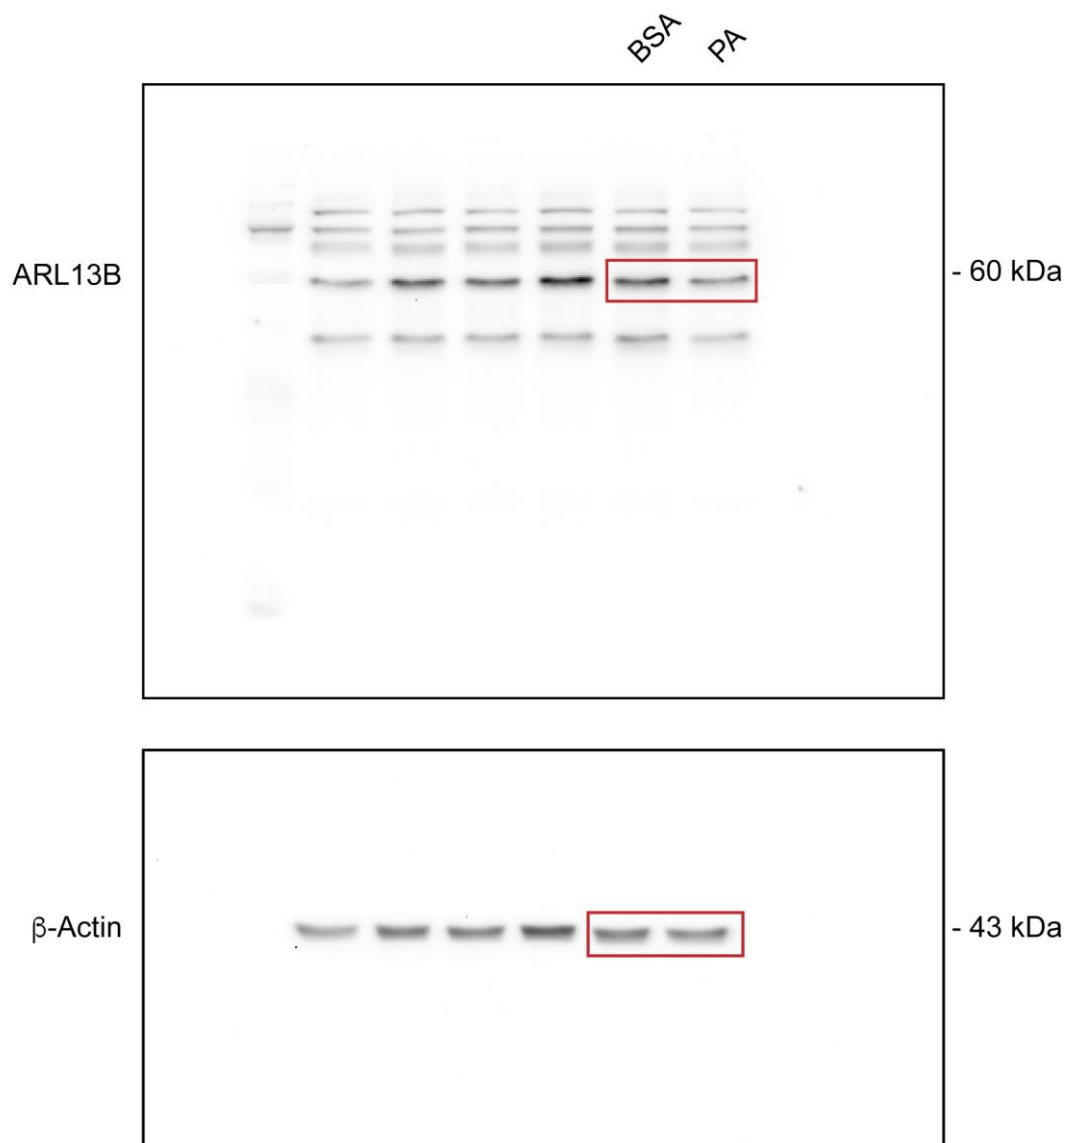

**Fig. 3**

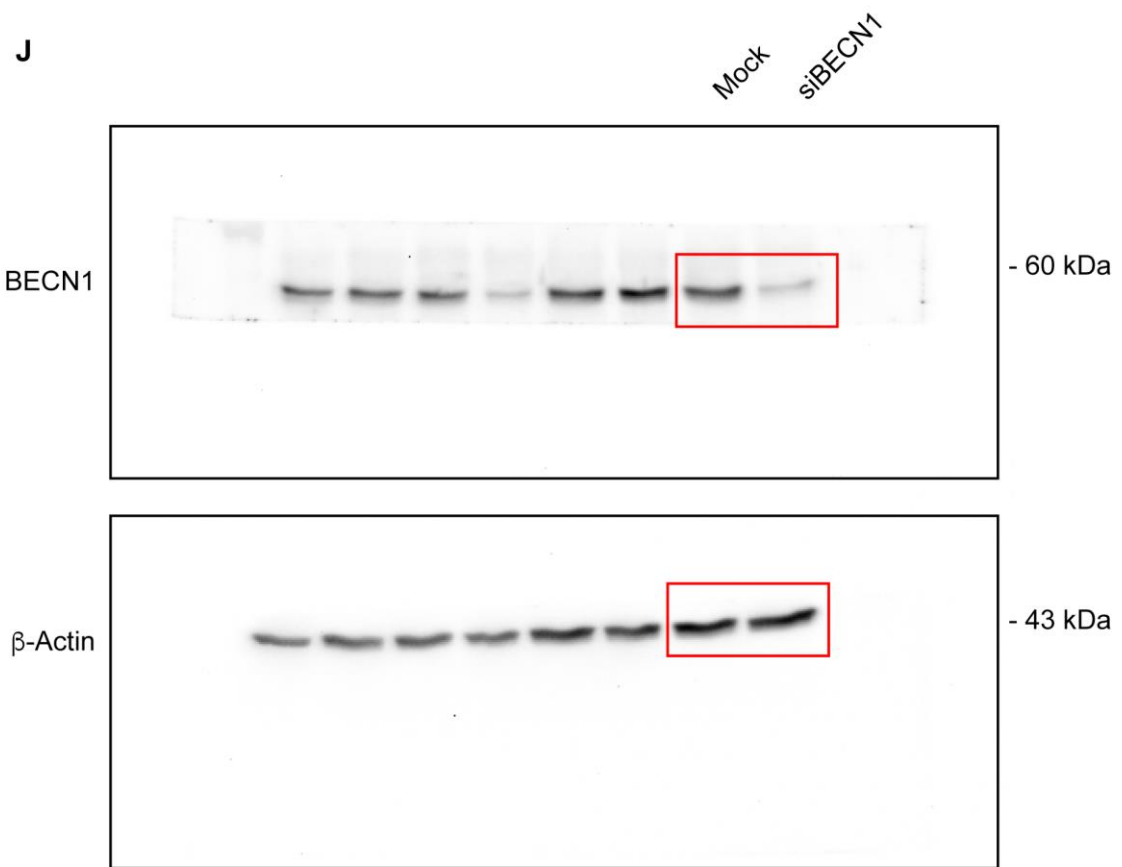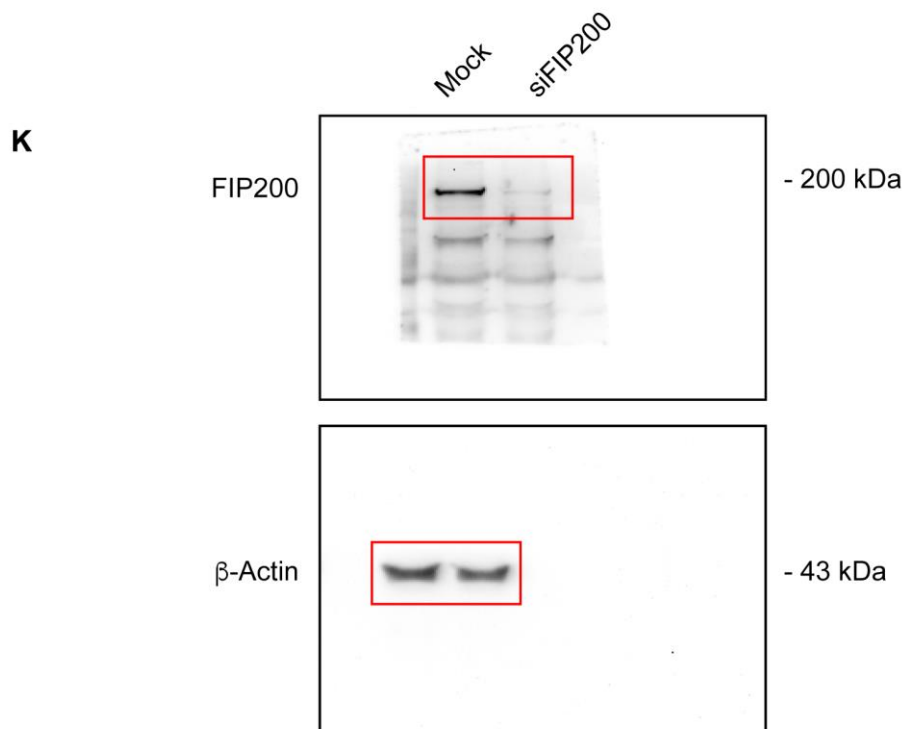

**Fig. 4**

**C**

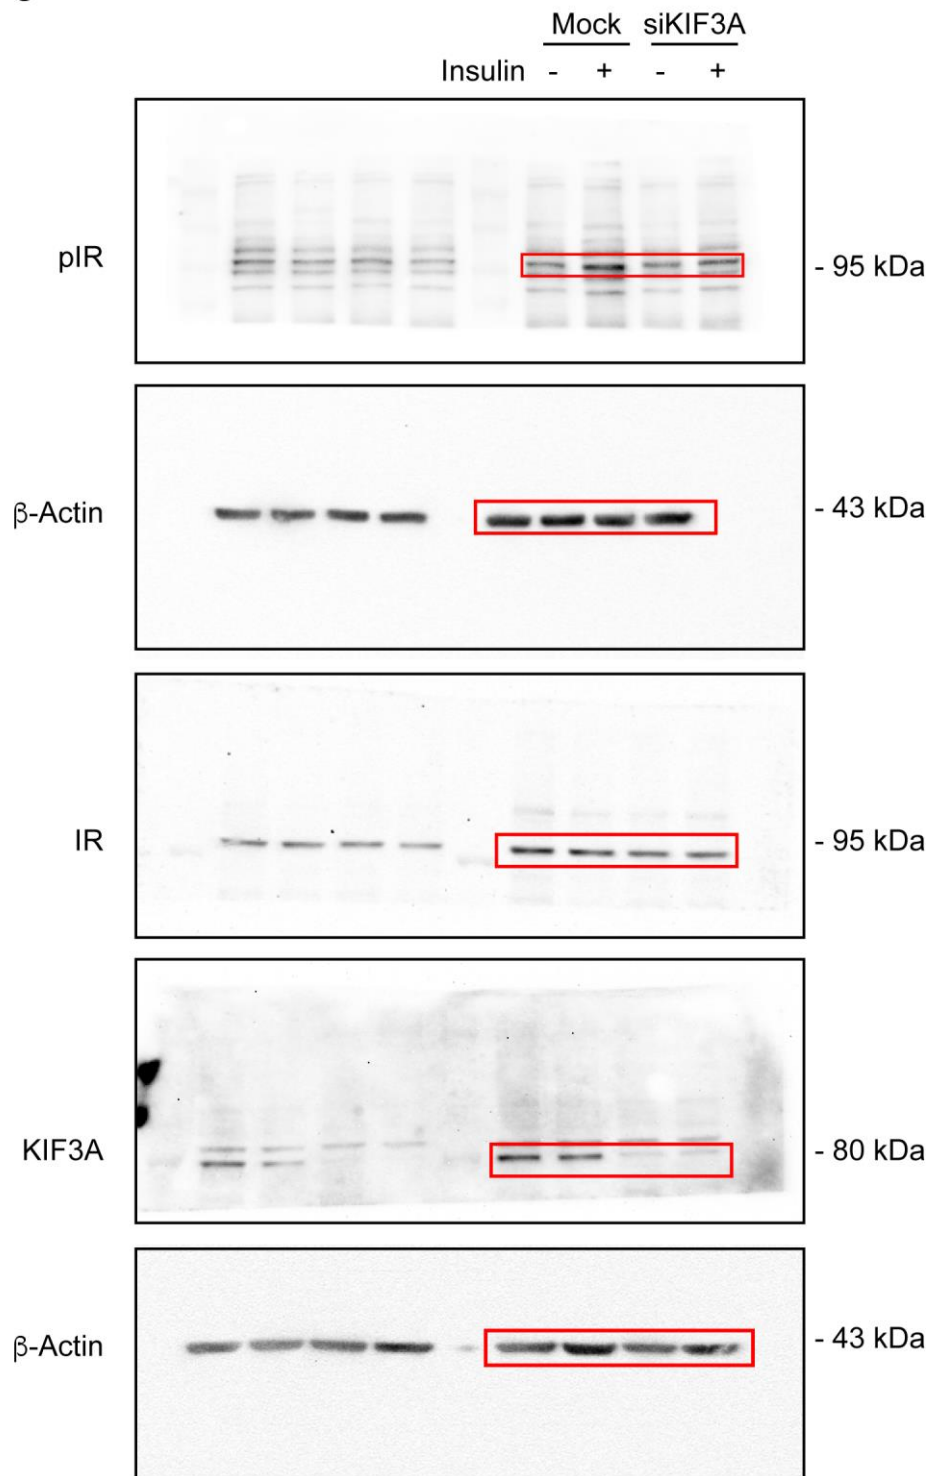

**Fig. 4**

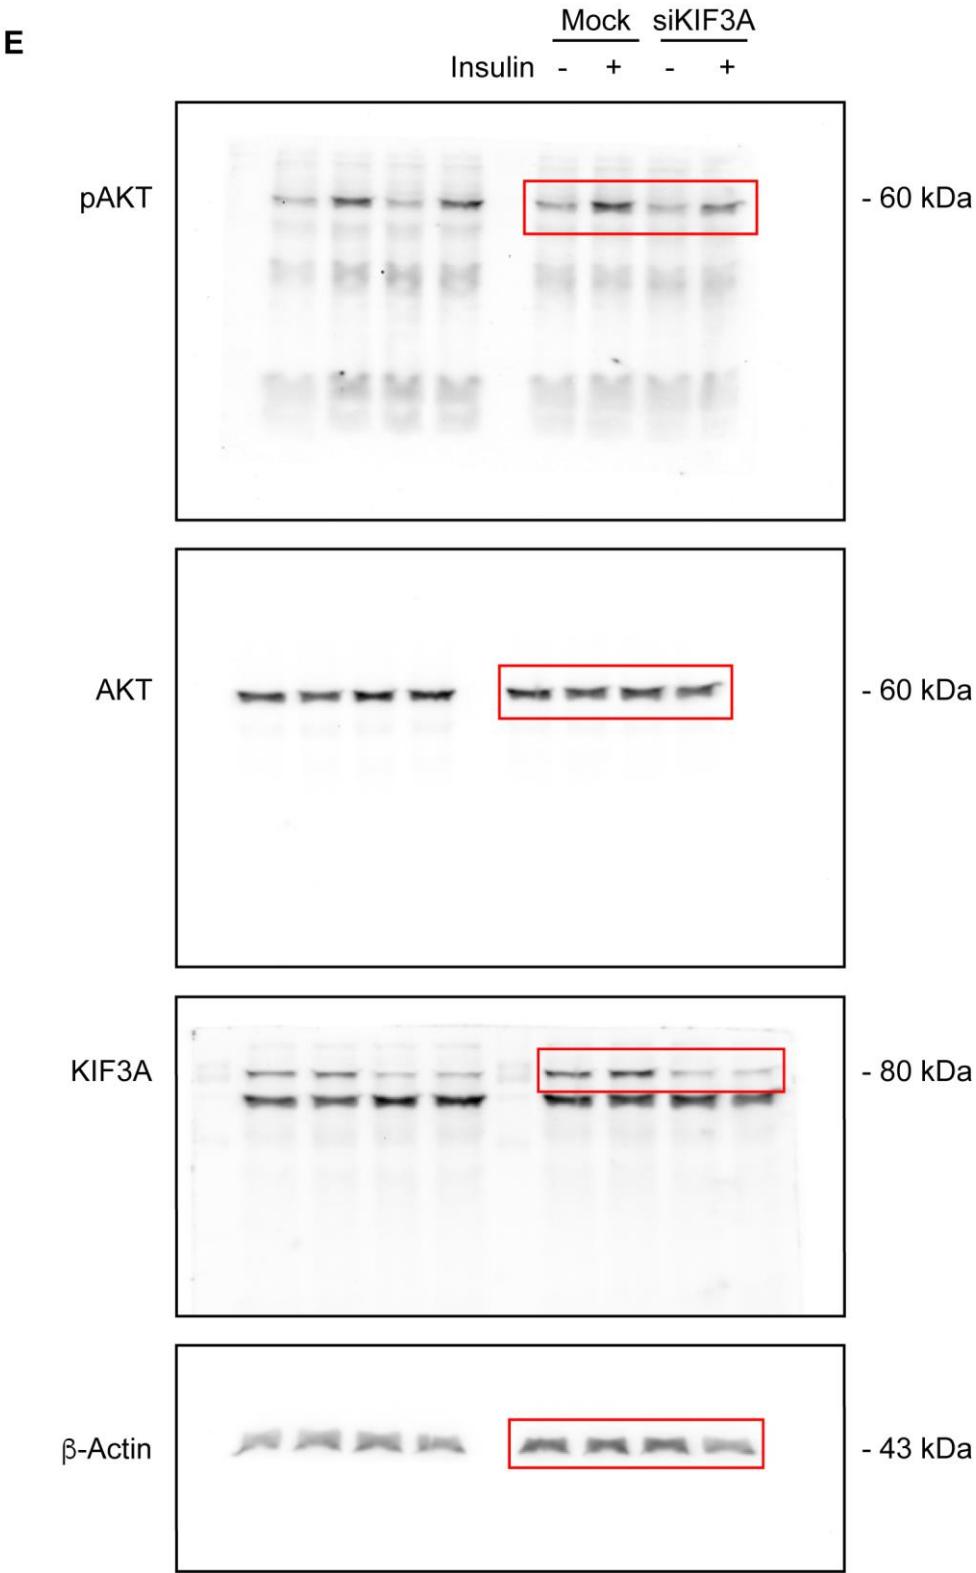

**Fig. 4**

**H**

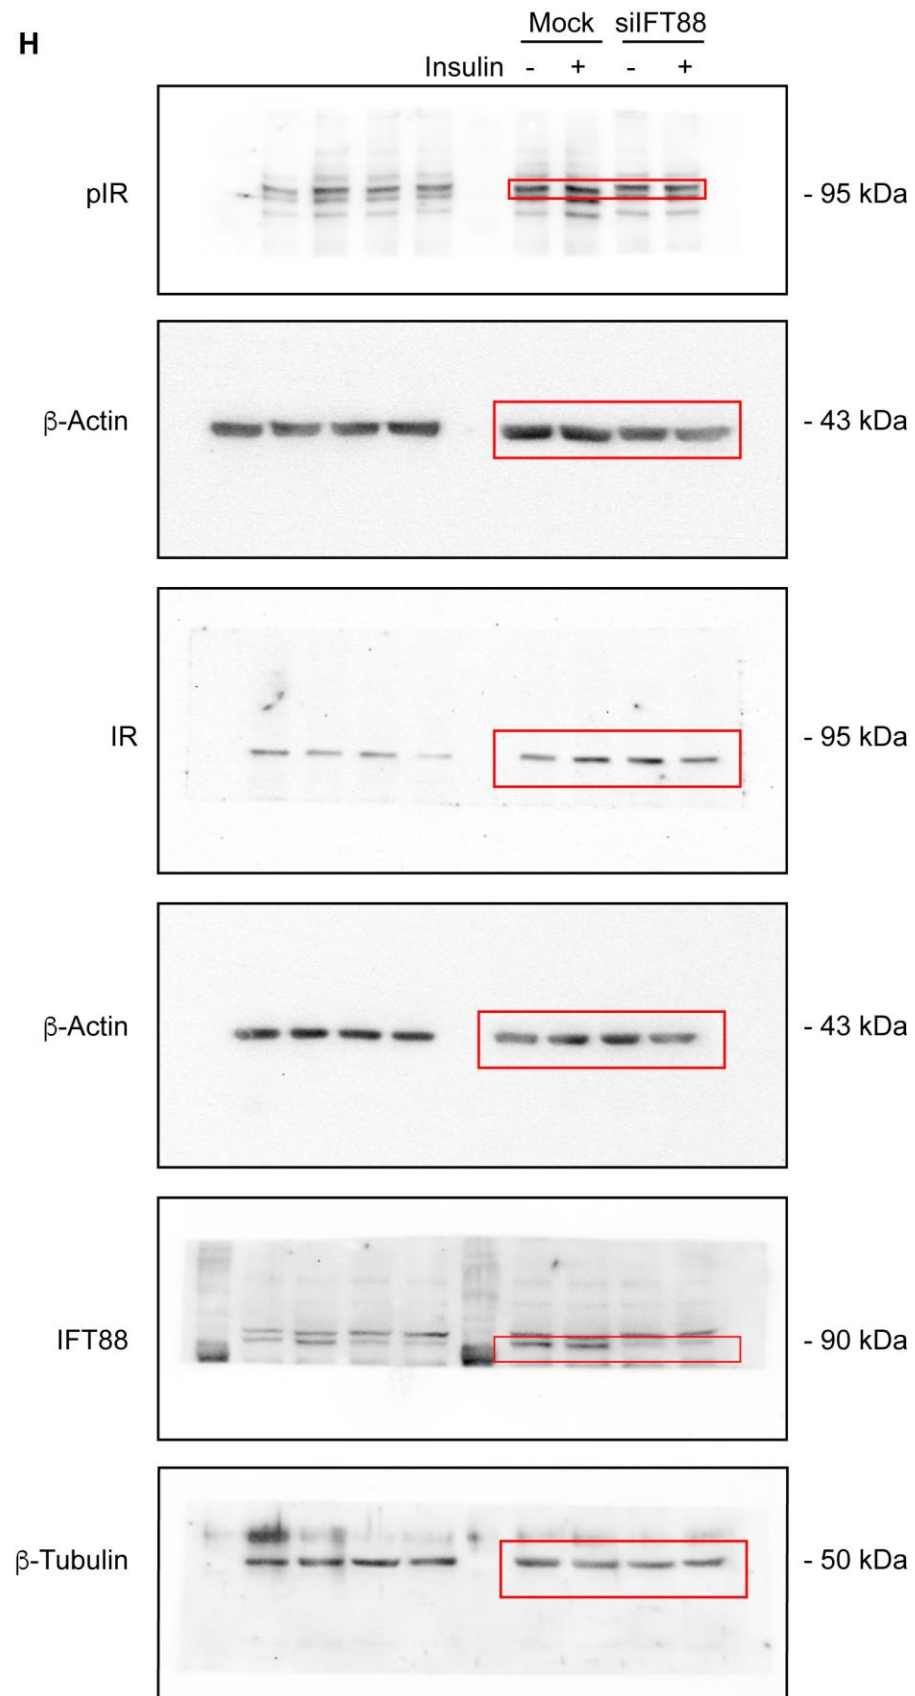

**Fig. 4**

**L**

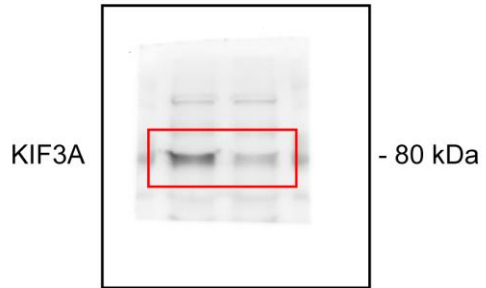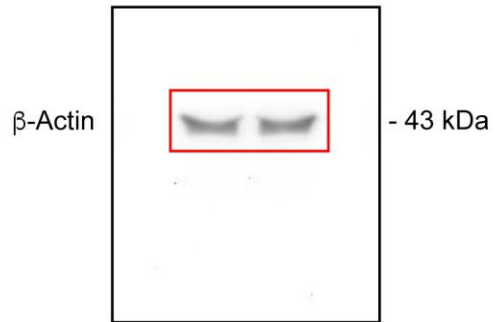

**M**

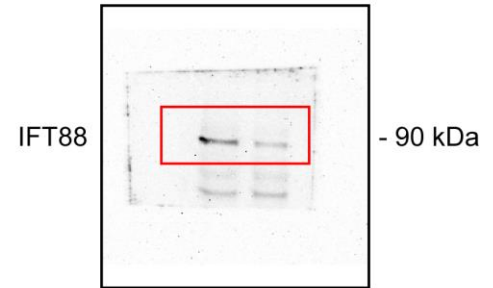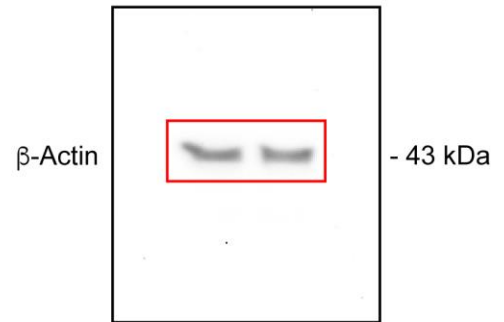

**Fig. 5**

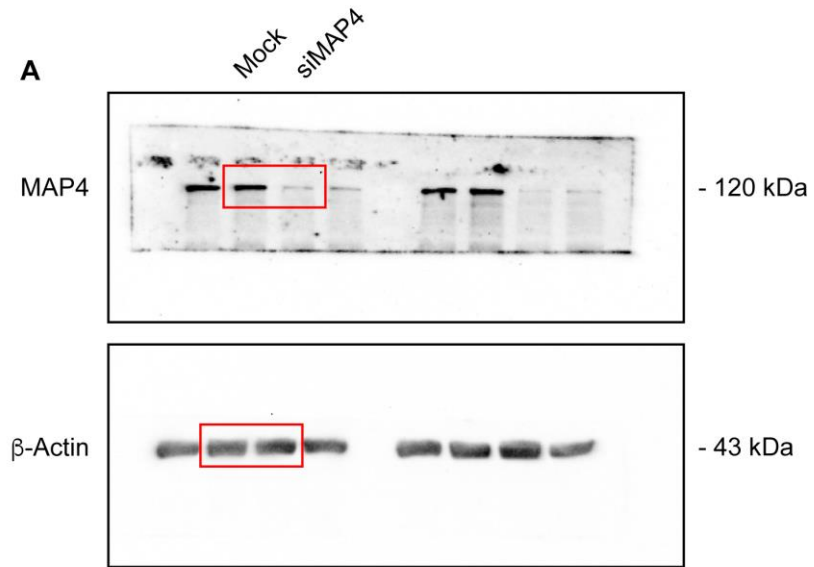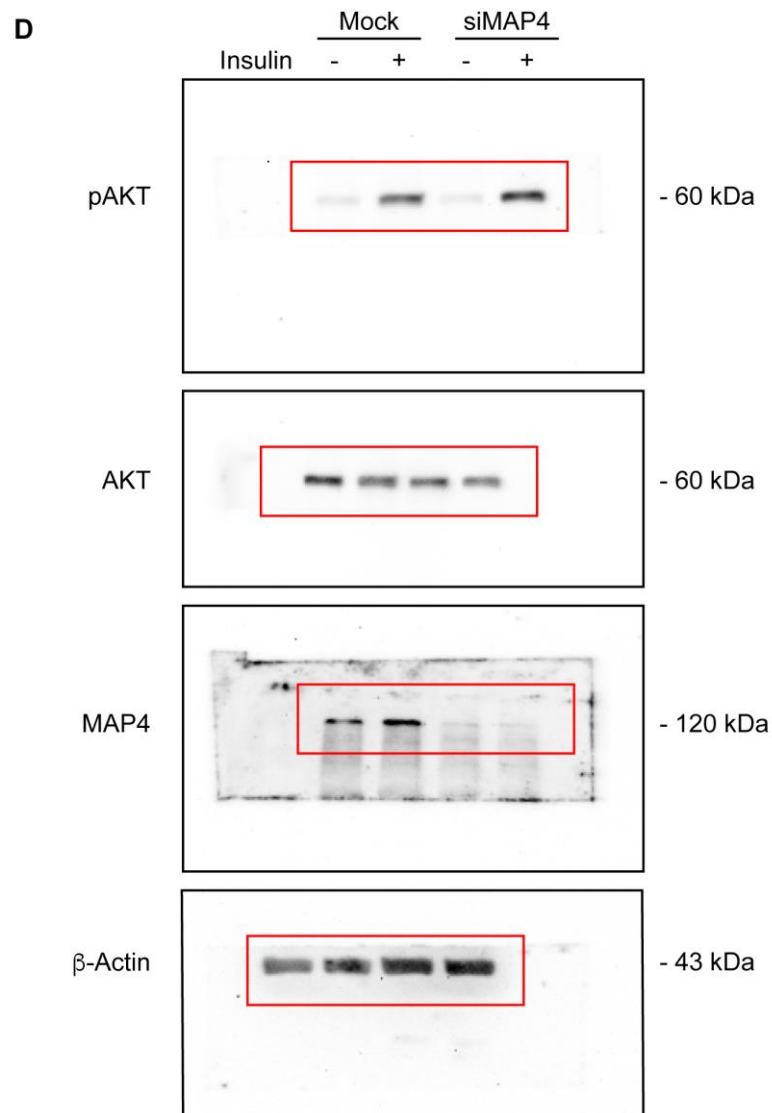



Fig. 5

I

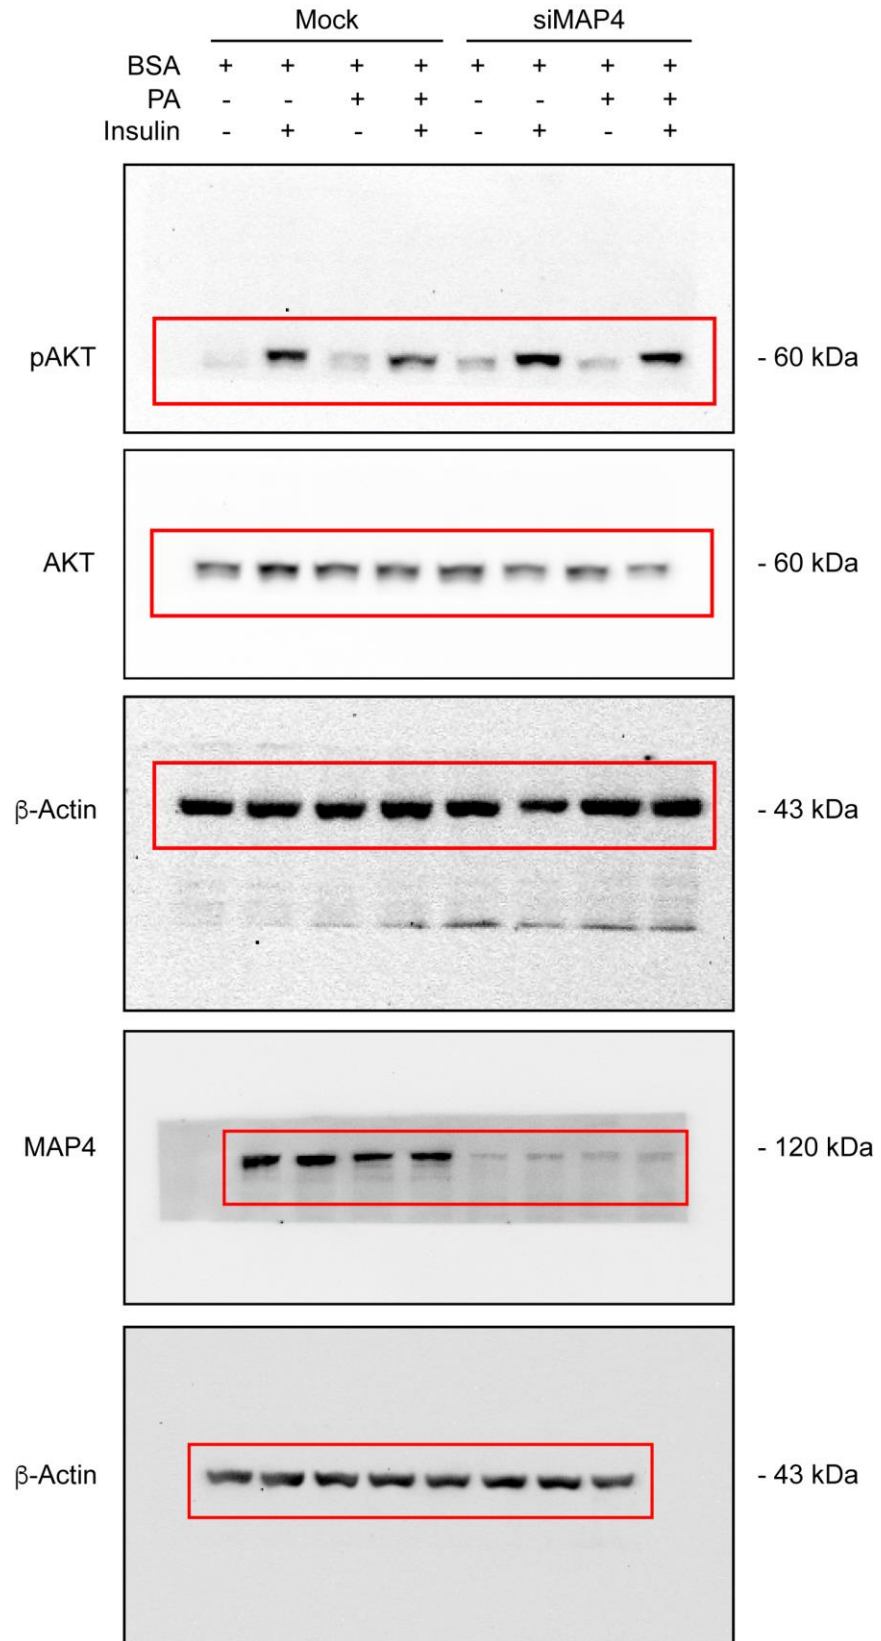

Supplement: 41419_2022_5109_MOESM4_ESM.pdf [file 41419_2022_5109_MOESM4_ESM.pdf]
